# Supplementary material for: Low Concentrations of Bisphenol A Induce Mouse Spermatogonial Cell Proliferation by G Protein–Coupled Receptor 30 and Estrogen Receptor-α
Source: PubMed Central journal article supplement (PMC3261991; doi:10.1289/ehp.1103781), 2011-08-03
Supplement: ehp.1103781.s001.pdf [file ehp.1103781.s001.pdf]

## **Supplemental Material**

### **Low Concentrations of Bisphenol A Induce Mouse Spermatogonial Cell Proliferation by G Protein-Coupled Receptor 30 and Estrogen Receptor- $\alpha$**

**Zhi-Guo Sheng<sup>1</sup> and Ben-Zhan Zhu<sup>1,2</sup>**

<sup>1</sup>State Key Laboratory of Environmental Chemistry and Ecotoxicology, Research Center for Eco-Environmental Science, Chinese Academy of Sciences, Beijing 100085, P.R. China; <sup>2</sup>Linus Pauling Institute, Oregon State University, Corvallis, OR 97331

## Table of Contents

|                                        |               |
|----------------------------------------|---------------|
| <b>Supplemental Material, Figure 1</b> | <b>P. 3</b>   |
| <b>Supplemental Material, Figure 2</b> | <b>P. 4</b>   |
| <b>Supplemental Material, Figure 3</b> | <b>P. 5</b>   |
| <b>Supplemental Material, Figure 4</b> | <b>P. 6</b>   |
| <b>Supplemental Material, Figure 5</b> | <b>P. 7</b>   |
| <b>Supplemental Material, Figure 6</b> | <b>P. 8-9</b> |
| <b>Supplemental Material, Figure 7</b> | <b>P. 10</b>  |

Supplemental Material, Figure 1

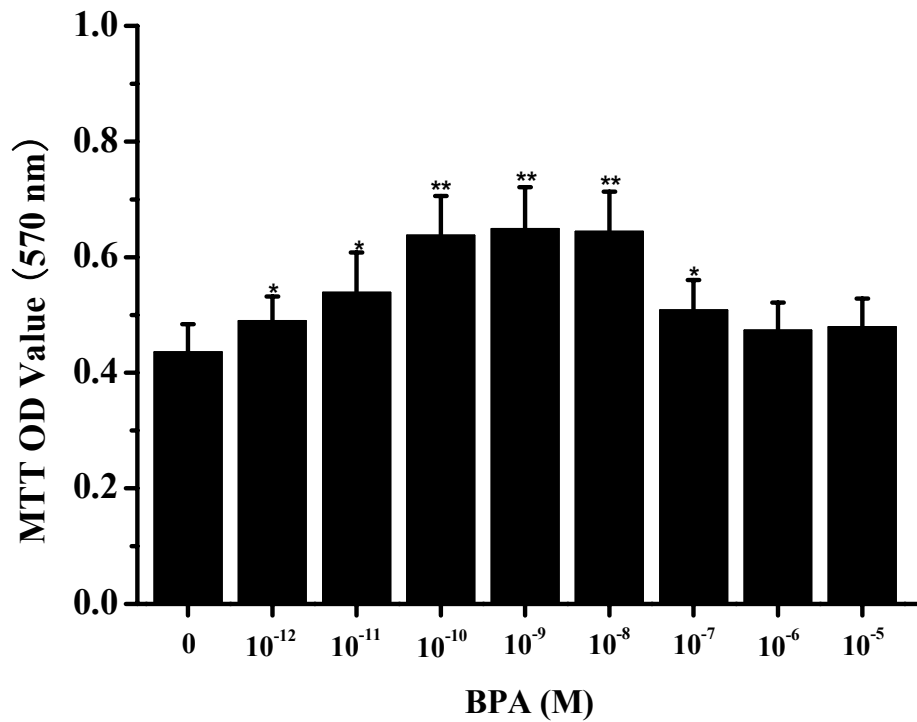

**Proliferative effects of BPA on GC-1 cells.** Cells were exposed to the indicated concentrations of BPA incubated for 12 h. cell proliferation was assessed by MTT assay, as described in *Materials and Methods*. The results of three independent experiments performed in triplicate were shown as mean  $\pm$  SD. \*,  $p < 0.05$ , compared with control; \*\*,  $p < 0.05$ , compared with  $10^{-12}$ ,  $10^{-11}$ ,  $10^{-7}$ ,  $10^{-6}$ , or  $10^{-5}$  M BPA;

Supplemental Material, Figure 2

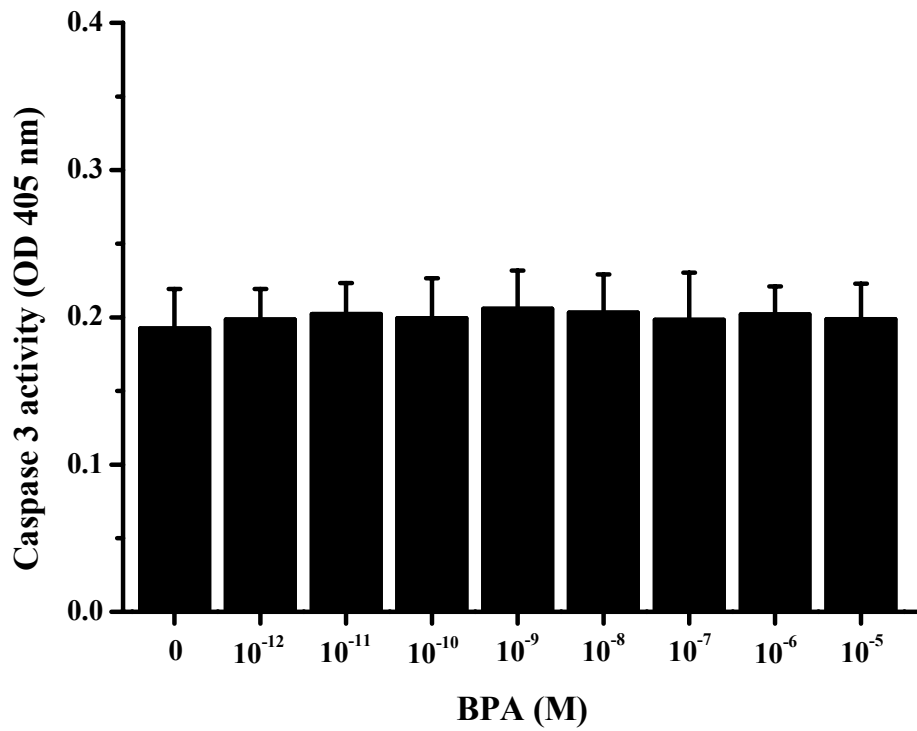

**Low concentrations of BPA do not suppress the caspase 3 activity of GC-1 cells.**

The activity of caspase-3 was measured using the caspase-3-specific tetrapeptide substrate Ac-DEVD-*p*-nitroanilide, as described in *Materials and methods*. The values were means  $\pm$  SEM of three independent experiments.

Supplemental Material, Figure 3

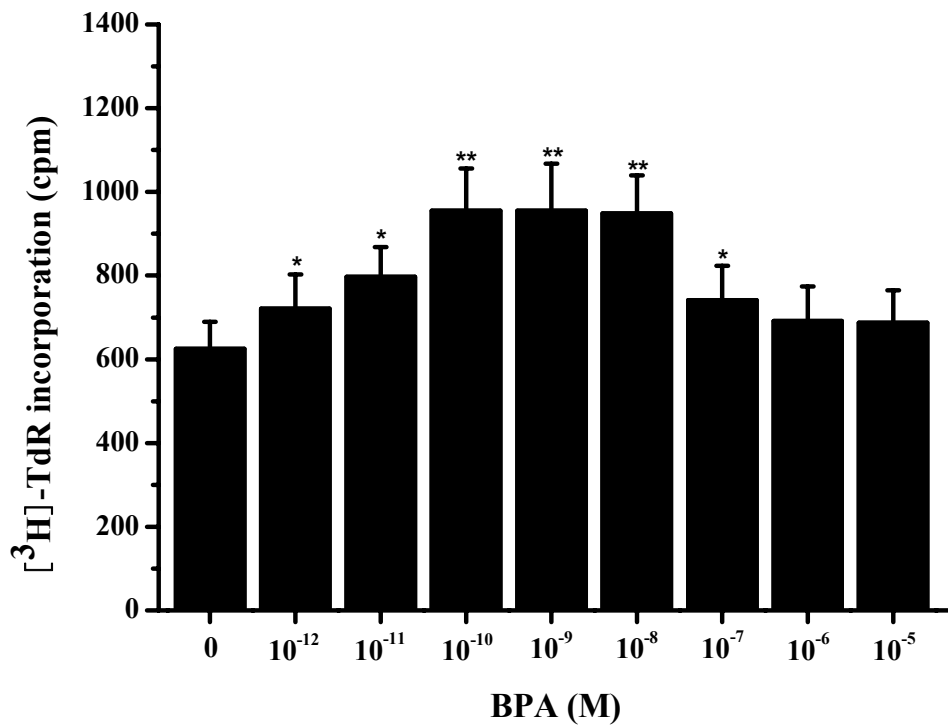

**[<sup>3</sup>H]-TdR incorporation effects of BPA on GC-1 cells.** Cells were exposed to the indicated concentrations of BPA incubated for 12 h. cell proliferation was assessed by [<sup>3</sup>H]-TdR incorporation analysis, as described in *Materials and Methods*. The results of three independent experiments performed in triplicate were shown as mean  $\pm$  SD. \*,  $p < 0.05$ , compared with control; \*\*,  $p < 0.05$ , compared with 10<sup>-12</sup>, 10<sup>-11</sup>, 10<sup>-7</sup>, 10<sup>-6</sup>, or 10<sup>-5</sup> M BPA;

Supplemental Material, Figure 4

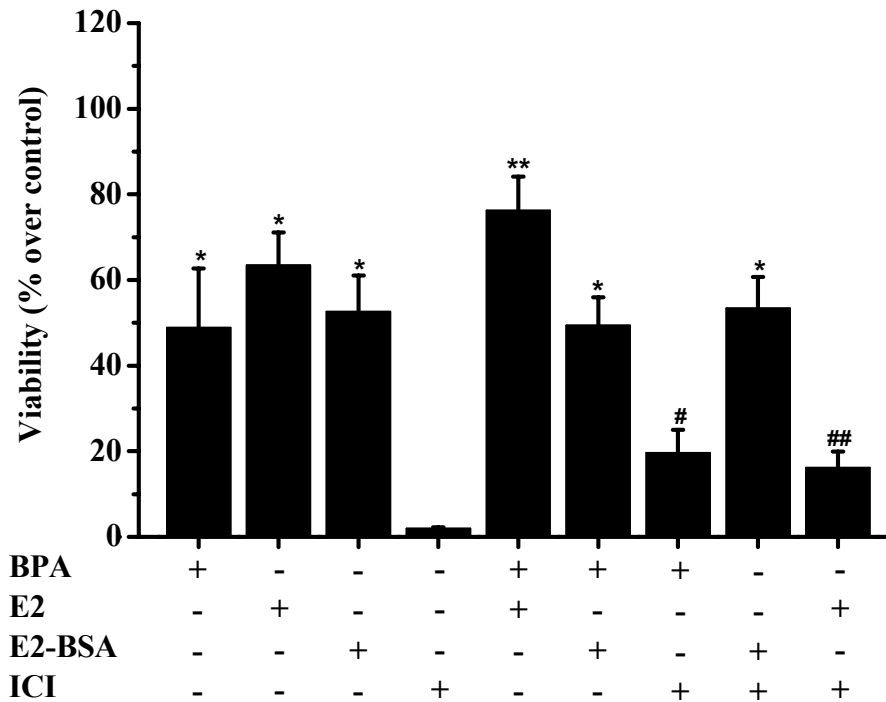

**BPA-mediated GC-1 cell proliferation is likely through activating the membrane GPCR and the nuclear ER- $\alpha$ .** Cells were exposed to  $10^{-9}$  M BPA, combined with E2 or E2-BSA (each at  $10^{-9}$  M) for 12 h or pretreatment with ICI for 60 min. Cell proliferation was determined by MTT assay, as described in *Materials and Methods*. The results of three independent experiments performed in triplicate were shown as mean  $\pm$  SEM. The values shown were the percent change of viable cells compared with the control (steroid-free medium containing DMSO for BSA or ethanol for E2 and E2-BSA) and control was set as 1. \*,  $p < 0.05$ , compared with control; \*\*,  $p < 0.05$ , compared with E2; #,  $p < 0.05$ , compared with BPA alone; ##,  $p < 0.05$ , compared with E2.

Supplemental Material, Figure 5

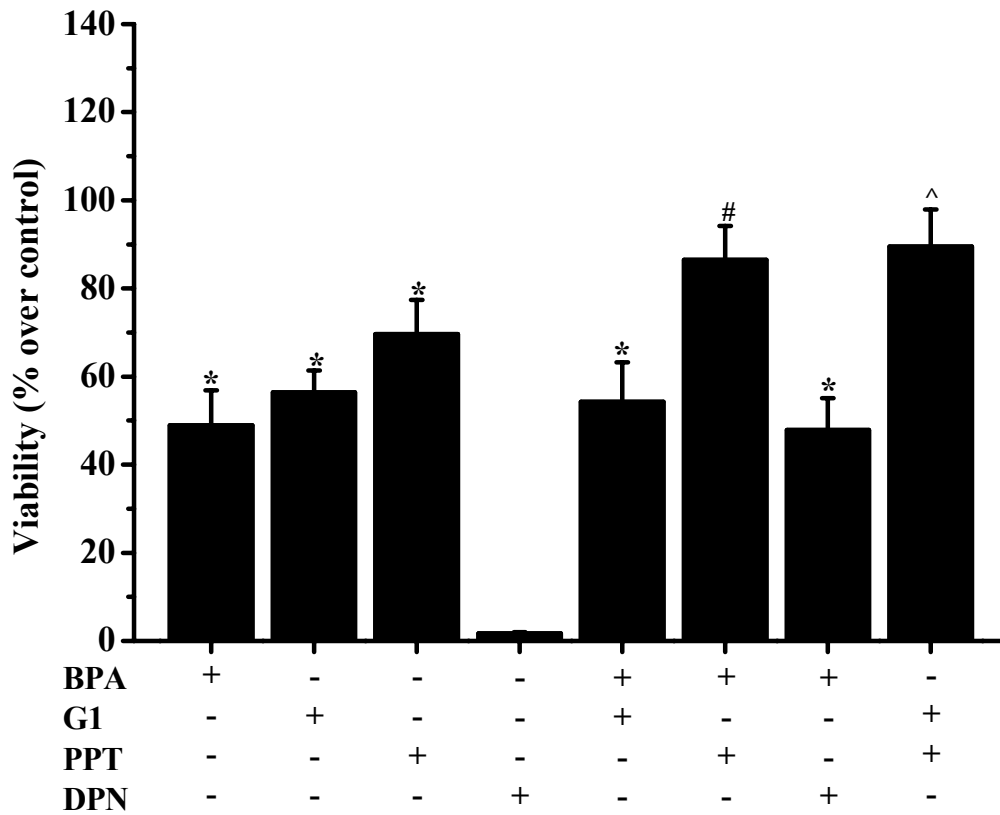

**GPR30 and ER agonists stimulate GC-1 cell proliferation.** Cells were treated with BPA ( $10^{-9}$  M), G1, PPT or DPN (each at  $10^{-7}$  M) alone or combination. Cell proliferation was determined by MTT assay, as described in *Materials and Methods*. The results of three independent experiments performed in triplicate were shown as mean  $\pm$  SEM. The values shown were the percent change of viable cells compared with the control (steroid-free medium containing DMSO) and control was set as 1. \*,  $p < 0.05$ , compared with control; #,  $p < 0.05$ , compared with BPA or PPT; ^,  $p < 0.05$ , compared with G1 or PPT.

Supplemental Material, Figure 6

**A**

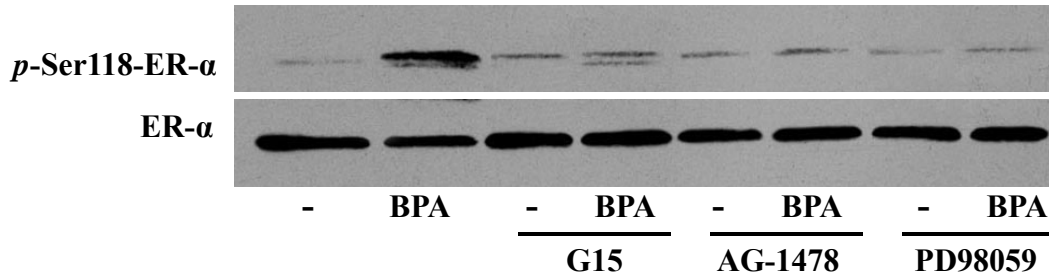

**B**

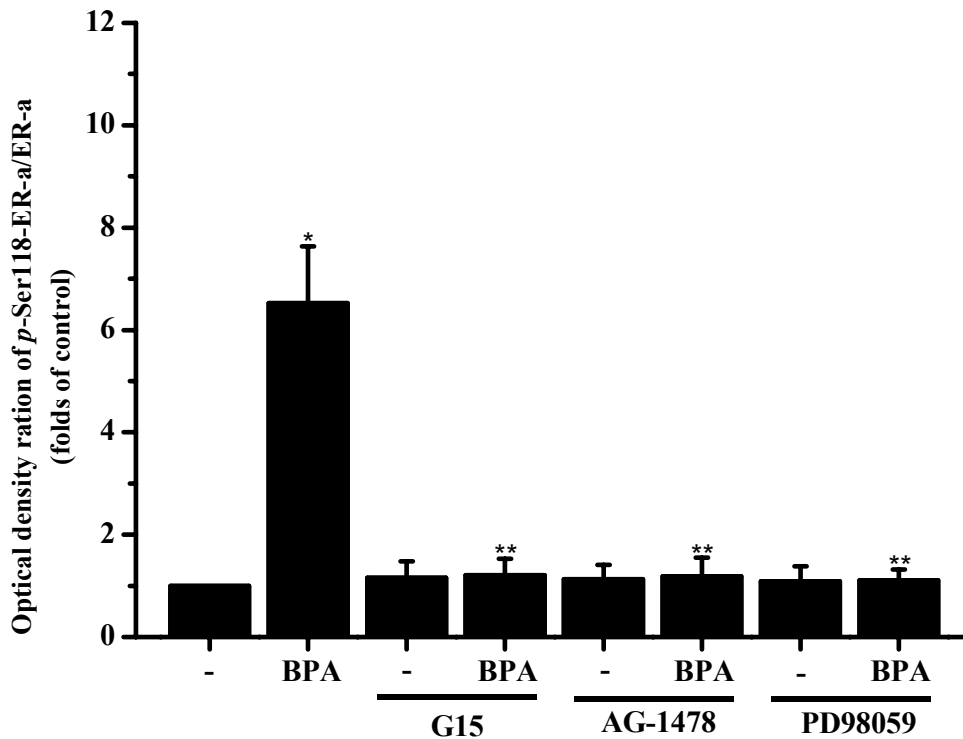

**BPA activates the ER-α of GC-1 cell by GPR30-EFGR-ERK signaling pathway.**

(A) Cells were treated with  $10^{-9}$  M BPA for 12 h combined with G15, AG-1478, or PD98059. Western blot analysis was used to examine both *p-ser118-ER-α* and total ER-α protein level, as described in *Materials and Methods*. The data represented similar results from three independent experiments performed in triplicate. (B) The



bands of *p*-Ser118-ER- $\alpha$  and ER- $\alpha$  were quantified by densitometry analysis, and the activated *p*-Ser118-ER- $\alpha$  was expressed as the *p*-Ser118-ER- $\alpha$ /ER- $\alpha$  ratio, plotted with SEM. \*,  $p < 0.05$ , compared with control; \*\*,  $p < 0.05$ , compared with BPA alone.

Supplemental Material, Figure 7

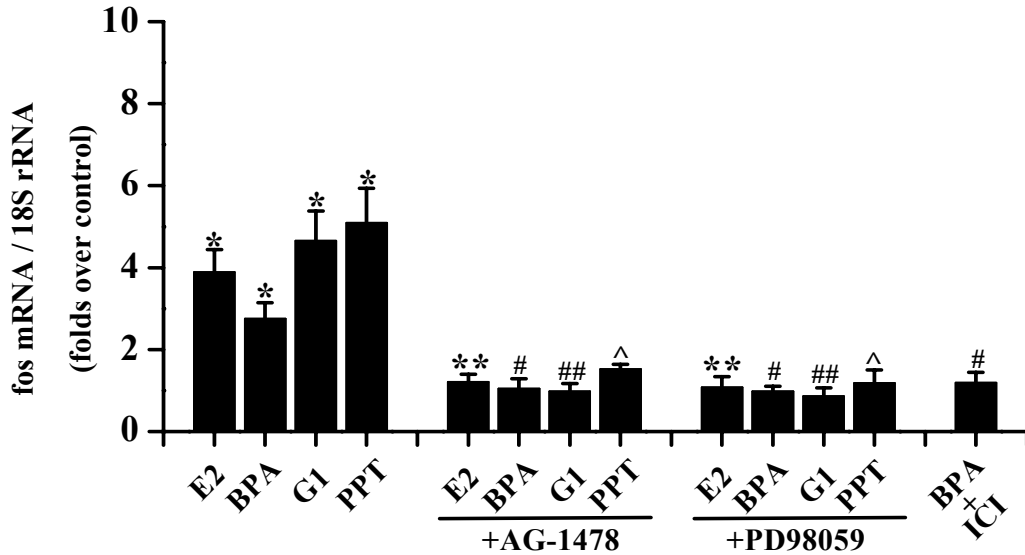

BPA stimulates the *fos* gene expression in GC-1 cells through activating the EFGR-ERK and ER- $\alpha$  pathways. Cells were treated with BPA ( $10^{-9}$  M), E2 ( $10^{-9}$  M), G1, PPT (each at  $10^{-7}$  M) for 12 h combined with AG-1478 (10  $\mu$ M), PD98059 (10  $\mu$ M) or ICI (10  $\mu$ M). Total RNA was extracted, and real-time RT-PCR was used to examine *fos* mRNA levels, as described in *Materials and Methods*. Each sample was normalized to its 18S rRNA content. The results of three independent experiments performed in triplicate were shown as mean  $\pm$  SEM. \*,  $p < 0.05$ , compared with control; \*\*,  $p < 0.05$ , compared with E2 alone; #,  $p < 0.05$ , compared with BPA alone; ##,  $p < 0.05$ , compared with G1 alone; ^,  $p < 0.05$ , compared with PPT alone.
